# Supplementary material
Source: Springer Nature journal article supplement (https://www.springermedizin.de/resource/supplementary/12889_2011_3564_MOESM1_ESM.pdf/9489274)
Supplement: MOESM1 [file 9489274]

**Creating or enhancing an enabling environment**

**Promote social equity by improving access to social entitlements**

*Activate District AIDS Committees*

*Advocate with government for rights of sex workers*

*NGOs facilitate access to social entitlements*

**Reduce violence and harassment of sex workers**

*Sensitisation of police*

*Legal empowerment workshops*

*Crisis management plans*

**Reduce stigma and discrimination**

*Media advocacy*

*Build capacity of District AIDS Committees*
